# Supplementary material
Source: HighWire-hosted journal article supplement (https://erj.ersjournals.com/content/52/5/1800248)
Supplement: inline-supplementary-material-1 [file inline-supplementary-material-1.pdf]

## **Risk assessment in medically treated Chronic Thromboembolic Pulmonary Hypertension patients**

Marion Delcroix<sup>1</sup>, Gerd Staehler<sup>2</sup>, Henning Gall<sup>3</sup>, Ekkehard Grünig<sup>4</sup>, Matthias Held<sup>5</sup>, Michael Halank<sup>6</sup>, Hans Klose<sup>7</sup>, Anton Vonk-Noordegraaf<sup>8</sup>, Stephan Rosenkranz<sup>9</sup>, Joanna Pepke-Zaba<sup>10</sup>, Christian F. Opitz<sup>11</sup>, J. Simon R. Gibbs<sup>12</sup>, Tobias J. Lange<sup>13</sup>, Iraklis Tsangaris<sup>14</sup>, Doerte Huscher<sup>15</sup>, David Pittrow<sup>16</sup>, Karen M Olsson<sup>17</sup>, Marius M Hoeper<sup>17</sup>

<sup>1</sup>Department of Respiratory Diseases, University Hospitals of Leuven, and Respiratory Division, Department CHROMETA, KU Leuven – University of Leuven, Leuven, Belgium;

<sup>2</sup>Medical Clinic I, Clinic Loewenstein, Loewenstein, Germany;

<sup>3</sup>Department of Pneumology, University of Gießen and Marburg, Germany;

<sup>4</sup>Thoraxclinic at the University Hospital Heidelberg, Heidelberg, Germany, and German Center of Lung Research (DZL), Germany;

<sup>5</sup>Department of Internal Medicine, Respiratory Medicine and Cardiology, Mission Medical Hospital, Würzburg, Germany;

<sup>6</sup>Internal Medicine I, University Hospital Carl Gustav Carus of Technical University Dresden, Dresden, Germany;

<sup>7</sup>University Medical Center Hamburg-Eppendorf, Center of Oncology, Department of Respiratory Medicine, Hamburg, Germany;

<sup>8</sup>Department of Pulmonary Diseases, VU University Medical Center, Amsterdam, The Netherlands;

<sup>9</sup>Clinic III for Internal Medicine (Cardiology) and Center for Molecular Medicine (CMMC), and the Cologne Cardiovascular Research Center (CCRC), University of Cologne, Germany;

<sup>10</sup>Pulmonary Vascular Diseases Unit, Royal Papworth Hospital, Cambridge, United Kingdom

<sup>11</sup>Department of Cardiology, DRK Kliniken Berlin, Berlin, Germany and Department of Cardiology, Medical University of Greifswald, Germany

<sup>12</sup>Department of Cardiology, National Heart & Lung Institute; Imperial College London, United Kingdom

<sup>13</sup>Department of Internal Medicine II, Division of Pneumology, University Medical Center Regensburg, Regensburg, Germany

<sup>14</sup>Pulmonary Hypertension Clinic, Attikon University Hospital, National and Kapodistrian University of Athens, Greece

<sup>15</sup>Epidemiology unit, German Rheumatism Research Centre, A Leibniz Institute, Berlin, Germany;

<sup>16</sup>Institute for Clinical Pharmacology, Medical Faculty, Technical University, Dresden, Germany;

<sup>17</sup>Department of Respiratory Medicine, Hannover Medical School, and German Center of Lung Research (DZL), Germany;

**Author for correspondence:** Marion Delcroix, MD, Department of Respiratory Diseases, University Hospitals of Leuven, Herestraat 49, 3000 Leuven, Belgium;

Email [marion.delcroix@uzleuven.be](mailto:marion.delcroix@uzleuven.be)

P +32 16 346833

**Running Title:** Risk stratification in CTEPH

**Word count text:** 3264/3000

**Number of tables:** 2 in manuscript and 5 in supplement

**Number of figures:** 6 in manuscript and 1 in supplement (figures+tables 8/8)

**Take home message:** The risk stratification for PAH of the current European PH guidelines may allow survival prediction in medically treated CTEPH patients (136 characters).

**Table S1.** Characteristics of the patients included into the baseline risk stratification group (analysis included only patients for whom all risk score variables were available, n=318)

|                                    | N   | All<br>n=318         | Low risk<br>n=37 (12%) | Intermediate risk<br>n=229 (72%) | High risk<br>n=52 (16%) |
|------------------------------------|-----|----------------------|------------------------|----------------------------------|-------------------------|
| Age (years)                        |     | 71 ± 11              | 62 ± 11                | 71 ± 11                          | 73 ± 10                 |
| Gender, % female                   |     | 53%                  | 49%                    | 54%                              | 54%                     |
| BMI (kg/m <sup>2</sup> )           | 296 | 29 ± 6               | 28 ± 5                 | 29 ± 7                           | 28 ± 5                  |
| CTEPH status (n; %)                |     |                      |                        |                                  |                         |
| Post PEA                           |     | 17 (5%)              | 5 (14%)                | 12 (5%)                          | 0 (0%)                  |
| Surgically inoperable              |     | 155 (49%)            | 17 (46%)               | 119 (52%)                        | 19 (37%)                |
| Medically inoperable               |     | 48 (15%)             | 3 (8%)                 | 37 (16%)                         | 8 (15%)                 |
| Accessible                         |     | 23 (7%)              | 4 (11%)                | 10 (4%)                          | 9 (17%)                 |
| Refused surgery                    |     | 47 (15%)             | 5 (14%)                | 31 (14%)                         | 11 (21%)                |
| Operability unknown                |     | 28 (9%)              | 3 (8%)                 | 20 (9%)                          | 5 (9%)                  |
| WHO FC Class<br>I/II/III/IV, %     |     | 1/15/72/12           | 0/62/38/0              | 1/10/82/7                        | 0/0/54/46               |
| 6MWD (m)                           |     | 300 ± 129            | 445 ± 101              | 304 ± 115                        | 183 ± 88                |
| NTproBNP (ng/L)<br>Median (Q1; Q3) | 258 | 1379<br>(344; 3,413) | 108<br>(73; 249)       | 1275<br>(383; 2,586)             | 3975<br>(3411; 6,444)   |
| BNP (ng/L)                         | 60  | 140 (53; 450)        | 31 (22; 59)            | 152 (57; 382)                    | 603 (482; 699)          |
| Haemodynamics                      |     |                      |                        |                                  |                         |
| RAP (mmHg)                         |     | 8 ± 6                | 4 ± 3                  | 8 ± 6                            | 12 ± 5                  |
| PAPm (mmHg)                        |     | 41 ± 10              | 36 ± 9                 | 40 ± 10                          | 47 ± 10                 |
| PAWP (mmHg)                        |     | 9 ± 4                | 8 ± 3                  | 9 ± 4                            | 10 ± 3                  |
| CI (l/min/m <sup>2</sup> )         |     | 2.2 ± 0.8            | 2.9 ± 0.6              | 2.3 ± 0.8                        | 1.6 ± 0.4               |
| PVR (dyn·s·cm <sup>-5</sup> )      | 316 | 698 ± 365            | 400 ± 167              | 656 ± 298                        | 1104 ± 419              |
| SvO <sub>2</sub> (%)               |     | 63 ± 9               | 71 ± 5                 | 64 ± 8                           | 54 ± 6                  |
| Comorbidities                      |     |                      |                        |                                  |                         |
| Any comorbidities                  | 265 | 92%                  | 97%                    | 91%                              | 93%                     |
| CHD                                | 251 | 18%                  | 13%                    | 19%                              | 17%                     |
| AHT                                | 256 | 62%                  | 56%                    | 63%                              | 61%                     |
| DM                                 | 259 | 16%                  | 0%                     | 17%                              | 24%                     |
| OSAS                               | 231 | 11%                  | 23%                    | 10%                              | 5%                      |
| VTE                                | 249 | 75%                  | 78%                    | 75%                              | 73%                     |
| Thyroid disease                    | 237 | 22%                  | 30%                    | 22%                              | 13%                     |

|                                                   |     |      |      |     |     |
|---------------------------------------------------|-----|------|------|-----|-----|
| <i>Atrial fibrillation</i>                        | 317 | 10%  | 0%   | 11% | 14% |
| Initial therapy (within 6 months after diagnosis) |     |      |      |     |     |
| <i>ERA</i>                                        |     | 28%  | 27%  | 27% | 35% |
| <i>PDE5i</i>                                      |     | 39%  | 38%  | 38% | 40% |
| <i>sGCs</i>                                       |     | 36%  | 46%  | 36% | 27% |
| <i>PCA</i>                                        |     | 0.3% | 0%   | 0%  | 2%  |
| <i>Monotherapy</i>                                |     | 96%  | 86%  | 97% | 96% |
| <i>Combination therapy</i>                        |     | 4%   | 14%  | 3%  | 4%  |
| <i>Anticoagulation</i>                            |     | 97%  | 100% | 97% | 98% |

**Table S2.** Characteristics of the patients with surgically inoperable CTEPH included into the baseline risk stratification group (n=248)

|                                                   | N   | All<br>n=248          | Low risk<br>n=37 (15%) | Intermediate risk<br>n=176 (71%) | High risk<br>n=35 (14%) |
|---------------------------------------------------|-----|-----------------------|------------------------|----------------------------------|-------------------------|
| Age (years)                                       |     | 68 ± 12               | 64 ± 10                | 69 ± 12                          | 67 ± 14                 |
| Gender, % female                                  |     | 53%                   | 46%                    | 53%                              | 57%                     |
| BMI (kg/m <sup>2</sup> )                          | 226 | 28 ± 6                | 28 ± 4                 | 29 ± 6                           | 28 ± 7                  |
|                                                   |     |                       |                        |                                  |                         |
|                                                   |     |                       |                        |                                  |                         |
|                                                   |     |                       |                        |                                  |                         |
| WHO FC Class<br>I/II/III/IV, %                    | 247 | 0/14/73/13            | 0/49/51/0              | 1/9/82/8                         | 0/0/50/50               |
| 6MWD (m)                                          | 209 | 307 ± 130             | 421 ± 105              | 306 ± 117                        | 167 ± 88                |
| NTproBNP (ng/L)<br>Median (Q1; Q3)                | 172 | 1,366<br>(356; 3,438) | 110<br>(67; 270)       | 1,334<br>(432; 2,970)            | 3,855<br>(2,644; 7,528) |
| BNP (ng/L)                                        | 37  | 207 (57; 456)         | 31 (22; 45)            | 208 (78; 444)                    | 536 (486; 670)          |
| Haemodynamics                                     |     |                       |                        |                                  |                         |
| RAP (mmHg)                                        | 236 | 8 ± 6                 | 4 ± 3                  | 8 ± 6                            | 14 ± 5                  |
| PAPm (mmHg)                                       |     | 41 ± 12               | 35 ± 9                 | 41 ± 11                          | 49 ± 13                 |
| PAWP (mmHg)                                       |     | 9 ± 4                 | 9 ± 3                  | 9 ± 4                            | 10 ± 3                  |
| CI (l/min/m <sup>2</sup> )                        | 236 | 2.3 ± 0.9             | 3.0 ± 0.5              | 2.3 ± 0.9                        | 1.6 ± 0.3               |
| PVR (dyn·s·cm <sup>-5</sup> )                     | 243 | 700 ± 411             | 367 ± 136              | 675 ± 322                        | 1,188 ± 553             |
| SvO <sub>2</sub> (%)                              | 229 | 64 ± 9                | 71 ± 5                 | 64 ± 9                           | 54 ± 6                  |
| Comorbidities                                     |     |                       |                        |                                  |                         |
| Any comorbidities                                 | 202 | 93%                   | 94%                    | 93%                              | 87%                     |
| CHD                                               | 196 | 19%                   | 9%                     | 21%                              | 23%                     |
| AHT                                               | 197 | 59%                   | 62%                    | 61%                              | 48%                     |
| DM                                                | 198 | 16%                   | 9%                     | 16%                              | 19%                     |
| OSAS                                              | 186 | 9%                    | 14%                    | 9%                               | 0%                      |
| VTE                                               | 199 | 77%                   | 69%                    | 79%                              | 77%                     |
| Thyroid disease                                   | 183 | 15%                   | 17%                    | 16%                              | 7%                      |
| Atrial fibrillation                               |     | 10%                   | 3%                     | 11%                              | 11%                     |
| Initial therapy (within 6 months after diagnosis) |     |                       |                        |                                  |                         |
| ERA                                               |     | 28%                   | 19%                    | 27%                              | 40%                     |

|                            |  |      |      |     |      |
|----------------------------|--|------|------|-----|------|
| <i>PDE5i</i>               |  | 47%  | 43%  | 47% | 51%  |
| <i>sGCs</i>                |  | 29%  | 38%  | 30% | 20%  |
| <i>PCA</i>                 |  | 0.4% | 0%   | 0%  | 3%   |
| <i>Monotherapy</i>         |  | 93%  | 92%  | 94% | 86%  |
| <i>Combination therapy</i> |  | 7%   | 8%   | 6%  | 14%  |
| <i>Anticoagulation</i>     |  | 98%  | 100% | 97% | 100% |

**Table S3.** Variables obtained at baseline for the baseline risk stratification group (n=561), and at baseline and at 3 months to 2 years follow up for the follow-up risk stratification group (n=231)

|                                       | Baseline group<br>at baseline<br>n=561 | Follow up group<br>at baseline<br>n=231 | Follow up group<br>at follow up<br>N=231 |
|---------------------------------------|----------------------------------------|-----------------------------------------|------------------------------------------|
| Age (years)                           | 69 ± 13                                | 68 ± 14                                 | 69 ± 14                                  |
| Gender, % female                      | 54%                                    | 55%                                     | -                                        |
| BMI (kg/m <sup>2</sup> )              | 28 ± 6                                 | 28 ± 6                                  | 28 ± 6                                   |
| <b>CTEPH status (n; %)</b>            |                                        |                                         |                                          |
| <i>Post PEA</i>                       | 30 (5%)                                | 17 (7%)                                 | -                                        |
| <i>Surgically inoperable</i>          | 248 (44%)                              | 107 (46%)                               | -                                        |
| <i>Medically inoperable</i>           | 84 (15%)                               | 32 (14%)                                | -                                        |
| <i>Accessible</i>                     | 48 (9%)                                | 15 (7%)                                 | -                                        |
| <i>Refused surgery</i>                | 73 (13%)                               | 35 (15%)                                | -                                        |
| <i>Operability unknown</i>            | 78 (14%)                               | 25 (11%)                                | -                                        |
| WHO FC Class<br>I/II/III/IV, %        | 0/15/72/13                             | 0/18/69/13                              | 4/31/61/4                                |
| 6MWD (m)                              | 302 ± 126                              | 319 ± 129                               | 318 ± 132                                |
| NTproBNP (ng/L)<br>Median (Q1; Q3)    | 1,402<br>(352; 3,565)                  | 1,266<br>(284; 3,477)                   | 867<br>(227; 2,082)                      |
| BNP (ng/L)                            | 186 (53; 486)                          | 166 (52; 465)                           | 145 (70; 324)                            |
| <b>Haemodynamics</b>                  |                                        |                                         |                                          |
| <i>RAP (mmHg)</i>                     | 8 ± 5                                  | 9 ± 6                                   | 8 ± 6                                    |
| <i>PAPm (mmHg)</i>                    | 42 ± 11                                | 42 ± 11                                 | 40 ± 10                                  |
| <i>PAWP (mmHg)</i>                    | 9 ± 4                                  | 9 ± 4                                   | 9 ± 4                                    |
| <i>CI (l/min/m<sup>2</sup>)</i>       | 2.2 ± 0.8                              | 2.2 ± 0.7                               | 2.3 ± 0.8                                |
| <i>PVR (dyn·s·cm<sup>-5</sup>)</i>    | 734 ± 387                              | 727 ± 380                               | 654 ± 374                                |
| <i>SvO<sub>2</sub> (%)</i>            | 63 ± 9                                 | 62 ± 9                                  | 63 ± 8                                   |
| <b>Comorbidities (from inclusion)</b> |                                        |                                         |                                          |
| <i>Any comorbidities</i>              | 91%                                    | 90%                                     | -                                        |
| <i>CHD</i>                            | 20%                                    | 23%                                     | -                                        |
| <i>AHT</i>                            | 59%                                    | 57%                                     | -                                        |
| <i>DM</i>                             | 16%                                    | 13%                                     | -                                        |
| <i>OSAS</i>                           | 9%                                     | 11%                                     | -                                        |

|                                                         |     |     |     |
|---------------------------------------------------------|-----|-----|-----|
| <i>VTE</i>                                              | 72% | 69% | -   |
| <i>Thyroid disease</i>                                  | 20% | 25% | -   |
| <i>Atrial fibrillation</i>                              | 8%  | 10% | -   |
| Therapy (at baseline and at time of FU risk evaluation) |     |     |     |
| <i>ERA</i>                                              | 24% | 36% | 40% |
| <i>PDE5i</i>                                            | 42% | 41% | 49% |
| <i>sGCs</i>                                             | 37% | 27% | 28% |
| <i>PCA</i>                                              | 1%  | 1%  | 2%  |
| <i>no therapy</i>                                       | 0%  | 0%  | 3%  |
| <i>Monotherapy</i>                                      | 93% | 92% | 71% |
| <i>Combination therapy</i>                              | 7%  | 8%  | 26% |
| <i>Anticoagulation</i>                                  | 97% | 98% | 97% |



**Table S4.** Characteristics of the patients with 0 to 3 low risk criteria at baseline (n=368)

|                                     | N   | All<br>n=368         | Low risk<br>criteria = 0<br>n=236 (64%) | Low risk<br>criteria = 1<br>n=85 (23%) | Low risk<br>criteria = 2<br>n=35 (10%) | Low risk<br>criteria = 3<br>n=12 (3%) |
|-------------------------------------|-----|----------------------|-----------------------------------------|----------------------------------------|----------------------------------------|---------------------------------------|
| Age (years)                         |     | 70 ± 12              | 73 ± 10                                 | 68 ± 11                                | 62 ± 14                                | 57 ± 12                               |
| Gender, % female                    |     | 52%                  | 56%                                     | 54%                                    | 34%                                    | 17%                                   |
| BMI (kg/m <sup>2</sup> )            | 346 | 28 ± 6               | 28 ± 6                                  | 29 ± 7                                 | 27 ± 6                                 | 26 ± 4                                |
| CTEPH status (n; %)                 |     |                      |                                         |                                        |                                        |                                       |
| <i>Post PEA</i>                     |     | 21 (6%)              | 11 (5%)                                 | 3 (4%)                                 | 5 (14%)                                | 2 (17%)                               |
| <i>Surgically inoperable</i>        |     | 173 (47%)            | 108 (46%)                               | 42 (49%)                               | 17 (49%)                               | 6 (50%)                               |
| <i>Medically inoperable</i>         |     | 54 (15%)             | 39 (17%)                                | 13 (15%)                               | 2 (6%)                                 | 0 (0%)                                |
| <i>Accessible</i>                   |     | 30 (8%)              | 21 (9%)                                 | 4 (5%)                                 | 4 (11%)                                | 1 (8%)                                |
| <i>Refused surgery</i>              |     | 53 (14%)             | 35 (15%)                                | 11 (13%)                               | 6 (17%)                                | 1 (8%)                                |
| <i>Operability unknown</i>          |     | 37 (10%)             | 22 (9%)                                 | 12 (14%)                               | 1 (3%)                                 | 2 (17%)                               |
| WHO FC Class<br>I/II/III/IV, %      |     | 1/15/73/12           | 0/0/84/16                               | 0/21/72/7                              | 6/69/23/3                              | 0/100/0/0                             |
| 6MWD (m)                            |     | 298 ± 131            | 248 ± 98                                | 335 ± 115                              | 467 ± 97                               | 552 ± 80                              |
| NT-proBNP (ng/L)<br>Median (Q1; Q3) | 300 | 1385<br>(343; 3,436) | 2503<br>(1121; 4,173)                   | 290<br>(124;<br>1,547)                 | 263<br>(88; 687)                       | 94<br>(75; 130)                       |
| BNP (ng/L) Median<br>(Q1; Q3)       | 69  | 140 (51; 456)        | 226 (105;<br>499)                       | 40 (17; 96)                            | 139 (23;<br>630)                       | 22 (22; 22)                           |
| Haemodynamics                       |     |                      |                                         |                                        |                                        |                                       |
| <i>RAP (mmHg)</i>                   |     | 8 ± 6                | 9 ± 6                                   | 7 ± 4                                  | 6 ± 5                                  | 7 ± 5                                 |
| <i>PAPm (mmHg)</i>                  |     | 41 ± 11              | 43 ± 10                                 | 38 ± 10                                | 36 ± 9                                 | 34 ± 10                               |
| <i>PAWP (mmHg)</i>                  |     | 9 ± 4                | 9 ± 4                                   | 9 ± 4                                  | 8 ± 4                                  | 8 ± 4                                 |
| <i>CI (l/min/m<sup>2</sup>)</i>     |     | 2.2 ± 0.8            | 2.1 ± 0.8                               | 2.5 ± 0.8                              | 2.4 ± 0.7                              | 2.9 ± 0.6                             |
| <i>PVR (dyn·s·cm<sup>-5</sup>)</i>  |     | 708 ± 366            | 805 ± 379                               | 566 ± 290                              | 522 ± 216                              | 380 ± 144                             |
| <i>SvO<sub>2</sub> (%)</i>          |     | 63 ± 9               | 61 ± 8                                  | 68 ± 7                                 | 64 ± 12                                | 73 ± 4                                |
| Comorbidities (from inclusion)      |     |                      |                                         |                                        |                                        |                                       |
| <i>Any comorbidities</i>            | 310 | 93%                  | 93%                                     | 93%                                    | 86%                                    | 91%                                   |
| <i>CHD</i>                          | 292 | 19%                  | 19%                                     | 19%                                    | 17%                                    | 18%                                   |
| <i>AHT</i>                          | 298 | 63%                  | 67%                                     | 63%                                    | 48%                                    | 46%                                   |
| <i>DM</i>                           | 302 | 16%                  | 18%                                     | 17%                                    | 7%                                     | 0%                                    |
| <i>OSAS</i>                         | 270 | 11%                  | 9%                                      | 13%                                    | 14%                                    | 14%                                   |

|                                                   |     |     |     |     |      |      |
|---------------------------------------------------|-----|-----|-----|-----|------|------|
| <i>VTE</i>                                        | 293 | 73% | 71% | 76% | 72%  | 82%  |
| <i>Thyroid disease</i>                            | 277 | 21% | 18% | 28% | 23%  | 20%  |
| <i>Atrial fibrillation</i>                        | 310 | 9%  | 13% | 2%  | 0%   | 0%   |
| Initial therapy (within 6 months after diagnosis) |     |     |     |     |      |      |
| <i>ERA</i>                                        |     | 28% | 28% | 28% | 31%  | 17%  |
| <i>PDE5i</i>                                      |     | 39% | 43% | 34% | 26%  | 33%  |
| <i>sGCs</i>                                       |     | 36% | 32% | 39% | 46%  | 58%  |
| <i>PCA</i>                                        |     | 1%  | 1%  | 0%  | 0%   | 0%   |
| <i>Monotherapy</i>                                |     | 95% | 95% | 95% | 97%  | 92%  |
| <i>Combination therapy</i>                        |     | 5%  | 5%  | 5%  | 3%   | 8%   |
| <i>Anticoagulation</i>                            |     | 97% | 98% | 92% | 100% | 100% |

**Table S5.** Characteristics of the patients with 0 to 3 low risk criteria at 3 months to 2 years follow-up (n=199)

|                                    | N   | All<br>n=199        | Low risk<br>criteria = 0<br>n=95 (48%) | Low risk<br>criteria = 1<br>n=64 (32%) | Low risk<br>criteria = 2<br>n=23 (12%) | Low risk<br>criteria = 3<br>n=17 (9%) |
|------------------------------------|-----|---------------------|----------------------------------------|----------------------------------------|----------------------------------------|---------------------------------------|
| Age (years)                        |     | 69 ± 14             | 72 ± 11                                | 72 ± 14                                | 58 ± 17                                | 60 ± 13                               |
| Gender, % female                   |     | 55%                 | 59%                                    | 58%                                    | 44%                                    | 35%                                   |
| BMI (kg/m <sup>2</sup> )           | 140 | 29 ± 7              | 29 ± 6                                 | 29 ± 8                                 | 28 ± 6                                 | 27 ± 4                                |
| CTEPH status (n; %)                |     |                     |                                        |                                        |                                        |                                       |
| <i>Post PEA</i>                    |     | 15 (8%)             | 4 (4%)                                 | 6 (9%)                                 | 2 (9%)                                 | 3 (18%)                               |
| <i>Surgically inoperable</i>       |     | 91 (46%)            | 49 (52%)                               | 22 (34%)                               | 12 (52%)                               | 8 (47%)                               |
| <i>Medically inoperable</i>        |     | 29 (15%)            | 16 (17%)                               | 12 (19%)                               | 0                                      | 1 (6%)                                |
| <i>Accessible</i>                  |     | 13 (7%)             | 4 (4%)                                 | 5 (8%)                                 | 1 (4%)                                 | 3 (18%)                               |
| <i>Refused surgery</i>             |     | 30 (15%)            | 15 (16%)                               | 7 (11%)                                | 6 (26%)                                | 2 (12%)                               |
| <i>Operability unknown</i>         |     | 21 (11%)            | 7 (7%)                                 | 12 (19%)                               | 2 (9%)                                 | 0                                     |
| WHO FC Class<br>I/II/III/IV, %     |     | 4/33/59/4           | 0/0/93/7                               | 0/58/41/2                              | 13/70/17/0                             | 29/71/0/0                             |
| 6MWD (m)                           |     | 320 ± 131           | 255 ± 94                               | 307 ± 92                               | 459 ± 107                              | 540 ± 82                              |
| NTproBNP (ng/L)<br>Median (Q1; Q3) | 166 | 997<br>(207; 2,194) | 1948<br>(997; 3,967)                   | 505<br>(186;<br>1,385)                 | 257<br>(128; 838)                      | 87<br>(71; 106)                       |
| BNP (ng/L) Median<br>(Q1; Q3)      | 34  | 145 (71; 324)       | 176 (112;<br>337)                      | 113 (27;<br>324)                       | 63 (48; 84)                            | 11 (-; -)                             |
| Haemodynamics                      |     |                     |                                        |                                        |                                        |                                       |
| <i>RAP (mmHg)</i>                  | 29  | 8 ± 5               | 9 ± 5                                  | 5 ± 3                                  | 7 ± 1                                  | 5 ± 1                                 |
| <i>PAPm (mmHg)</i>                 | 31  | 38 ± 9              | 41 ± 7                                 | 35 ± 10                                | 28 ± 11                                | 30 ± 15                               |
| <i>PAWP (mmHg)</i>                 | 30  | 9 ± 4               | 10 ± 4                                 | 7 ± 3                                  | 13 ± 0                                 | 9 ± 1                                 |
| <i>CI (l/min/m<sup>2</sup>)</i>    | 31  | 2.1 ± 0.6           | 1.9 ± 0.6                              | 2.2 ± 0.5                              | 2.4 ± 0.6                              | 2.8 ± 0.4                             |
| <i>PVR (dyn·s·cm<sup>-5</sup>)</i> | 31  | 708 ± 430           | 843 ± 424                              | 540 ± 190                              | 205 ± 86                               | 309 ± 221                             |
| <i>SvO<sub>2</sub> (%)</i>         | 29  | 62 ± 9              | 61 ± 10                                | 68 ± 3                                 | 71 ± 1                                 | -                                     |
| Comorbidities (from inclusion)     |     |                     |                                        |                                        |                                        |                                       |
| <i>Any comorbidities</i>           | 163 | 90%                 | 94%                                    | 95%                                    | 73%                                    | 73%                                   |
| <i>CHD</i>                         | 153 | 25%                 | 25%                                    | 33%                                    | 14%                                    | 7%                                    |
| <i>AHT</i>                         | 160 | 58%                 | 57%                                    | 62%                                    | 47%                                    | 60%                                   |
| <i>DM</i>                          | 159 | 14%                 | 19%                                    | 13%                                    | 7%                                     | 0%                                    |

|                                         |     |     |     |     |     |      |
|-----------------------------------------|-----|-----|-----|-----|-----|------|
| <i>OSAS</i>                             | 135 | 11% | 8%  | 15% | 7%  | 18%  |
| <i>VTE</i>                              | 146 | 69% | 72% | 71% | 64% | 47%  |
| <i>Thyroid disease</i>                  | 139 | 25% | 25% | 24% | 23% | 31%  |
| <i>Atrial fibrillation</i>              | 195 | 10% | 14% | 8%  | 0%  | 6%   |
| Therapy (at time of FU risk evaluation) |     |     |     |     |     |      |
| <i>ERA</i>                              |     | 36% | 47% | 20% | 44% | 24%  |
| <i>PDE5i</i>                            |     | 49% | 53% | 52% | 44% | 29%  |
| <i>sGCs</i>                             |     | 28% | 23% | 31% | 17% | 53%  |
| <i>PCA</i>                              |     | 1%  | 0%  | 2%  | 4%  | 0%   |
| <i>No therapy</i>                       |     | 3%  | 0%  | 5%  | 4%  | 6%   |
| <i>Monotherapy</i>                      |     | 78% | 73% | 83% | 83% | 82%  |
| <i>Combination therapy</i>              |     | 20% | 27% | 13% | 13% | 12%  |
| <i>Anticoagulation</i>                  |     | 97% | 95% | 98% | 96% | 100% |
